# Supplementary material for: Facile synthesis of novel 3D flower-like magnetic La@Fe/C composites from ilmenite for efficient phosphate removal from aqueous solution
Source: Royal Society of Chemistry journal article supplement (doi:10.1039/c9ra05606h), 2019-01-01
Supplement: c9ra05606h1.pdf [file c9ra05606h1.pdf]

## Supporting Information

### Facile synthesis of novel 3D flower-like magnetic La@Fe/C composite from ilmenite for efficient phosphate removal from aqueous solution

Pengchen Wang,<sup>a</sup> Andac Armutlulu,<sup>b</sup> Wenju Jiang,<sup>a,c</sup> Bo Lai<sup>a</sup> and Ruzhen Xie<sup>a,\*</sup>

<sup>a</sup> College of Architecture and Environment, Sichuan University, Chengdu 610065, P.R. China

<sup>b</sup> Department of Mechanical and Process Engineering, ETH Zurich, Leonhardstrasse 27, 8092, Zurich, Switzerland

<sup>c</sup> National Engineering Research Center for Flue Gas Desulfurization, Chengdu 610065, P.R.

China

\* Corresponding author. E-mail address: xieruzhen@scu.edu.cn; Phone: +86-28-8540 7800.

Fax: +86-28- 8540 3016

## Figures

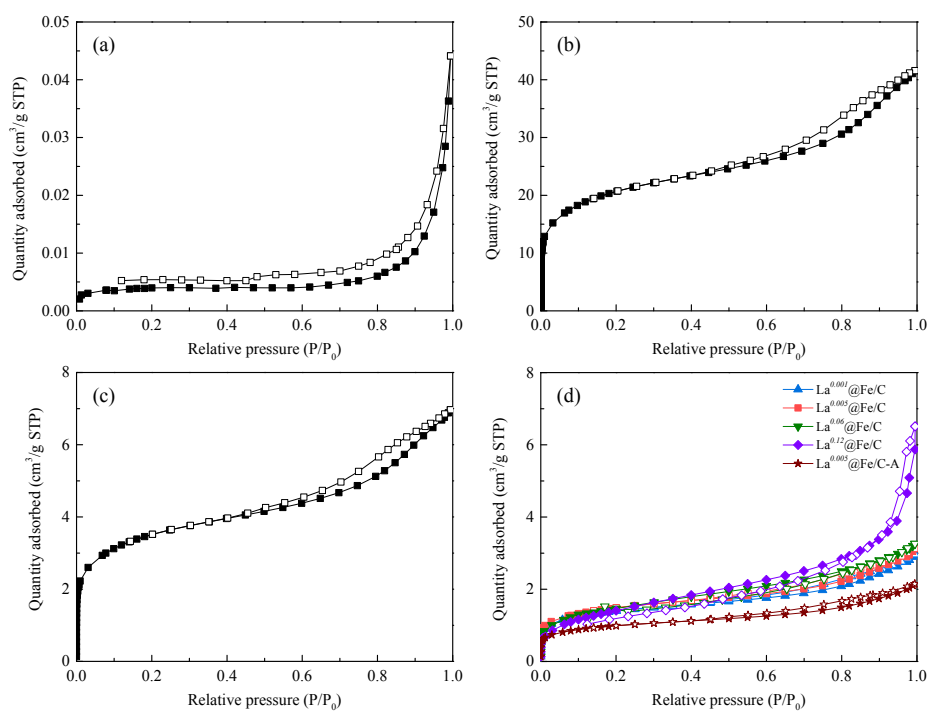

Fig. S1  $N_2$  adsorption-desorption isotherms of (a) ilmenite, (b) coconut AC, (c) Fe/C precursor, and (d) La@Fe/C.
